# Supplementary material for: High-Dose Vitamin D Supplementation Significantly Affects the Placental Transcriptome
Source: MDPI journal article supplement (doi:10.3390/nu15245032), 2023-12-07
Supplement: s1 [file s1]

## Supplementary

Table S1: Differentially expressed genes following correction of a false discovery rate of 10%

| Gene                                                                               | Protein                                              | Function*                                                                                                                                                                                                                                                                                                                                             | Log2FC | Adjusted p-value |
|------------------------------------------------------------------------------------|------------------------------------------------------|-------------------------------------------------------------------------------------------------------------------------------------------------------------------------------------------------------------------------------------------------------------------------------------------------------------------------------------------------------|--------|------------------|
| <b>Vitamin D insufficient/deficient vs vitamin D sufficient in early pregnancy</b> |                                                      |                                                                                                                                                                                                                                                                                                                                                       |        |                  |
| <i>C2</i>                                                                          | Complement C2                                        | Part of the complement system. Deficiency in C2 complement has been associated to certain autoimmune diseases                                                                                                                                                                                                                                         | 2.69   | 0.00178          |
| <i>XIST</i>                                                                        | RNA gene, non-protein coding                         | Involved in X inactivation                                                                                                                                                                                                                                                                                                                            | 2.09   | 0.00732          |
| <i>SKIC2</i>                                                                       | Superkiller complex protein 2                        | A DEAD box protein** which is a putative RNA helicase. Involved in a number of cellular processes including alterations of RNA secondary structure like initiation of translation, nuclear and mitochondrial splicing and ribosome and spliceosome assembly. May be involved in antiviral activity by blocking translation of poly(A) deficient mRNAs | 2.44   | 0.0176           |
| <i>SQSTM1</i>                                                                      | Sequestosome-1                                       | Binds ubiquitin and regulates activation of the nuclear factor kappa-B (NF-κB) signaling pathway. Mutations in this gene are associated to Paget disease of the bone.                                                                                                                                                                                 | 1.29   | 0.0191           |
| <i>RNU1-4</i>                                                                      | RNA gene, non-protein coding                         | Is involved in the pathway for Spliceosomal Splicing Cycle.                                                                                                                                                                                                                                                                                           | 1.38   | 0.0824           |
| <i>PTH</i>                                                                         | Parathyroid hormone                                  | Regulates blood calcium and phosphate. Stimulates calcium release from bones and inhibit calcium excretion in the kidneys. Stimulates the CYP27B1 activity resulting in increased 1,25(OH) <sub>2</sub> D                                                                                                                                             | 1.66   | 0.0824           |
| <b>90µg vs 10µg for all samples (n=70) with correction for offspring sex</b>       |                                                      |                                                                                                                                                                                                                                                                                                                                                       |        |                  |
| <i>EIF3K</i>                                                                       | Eukaryotic translation initiation factor 3 subunit K | Component of the eukaryotic translation initiation factor 3 complex which is necessary for initiation of protein synthesis especially translation of a subset of mRNAs involved in cell proliferation, including cell cycling, differentiation, and apoptosis.                                                                                        | 1.70   | 0.0132           |

|                                                                      |                                                   |                                                                                                                                                                                       |       |         |
|----------------------------------------------------------------------|---------------------------------------------------|---------------------------------------------------------------------------------------------------------------------------------------------------------------------------------------|-------|---------|
| <i>TDRD12</i>                                                        | Putative ATP-dependent RNA helicase TDRD12        | Predicted to enable ATP binding activity; RNA helicase activity; and nucleic acid binding activity. Involved in gamete generation, gene silencing by RNA, and piRNA metabolic process | 2.51  | 0.0403  |
| <i>JPH1</i>                                                          | Junctophilin-1                                    | Component of junctional complexes. Contribute to junctional complexes between the plasma membrane and endoplasmic/sarcoplasmic reticulum in skeletal muscle cells                     | -1.08 | 0.0429  |
| <b>90µg vs 10µg for placentas from pregnancies with boys (n=32)</b>  |                                                   |                                                                                                                                                                                       |       |         |
| <i>COX5B</i>                                                         | Cytochrome c oxidase subunit 5B, mitochondrial    | Subunit 5B of the Cytochrome C oxidase which is the terminal enzyme of the mitochondrial respiratory chain                                                                            | 3.52  | 0.00316 |
| <i>NLRP2</i>                                                         | NACHT, LRR and PYD domains-containing protein 2   | Member of the nucleotide-binding and leucine-rich repeat receptor family which are thought to be involved in regulation of immune responses                                           | 2.76  | 0.0461  |
| <i>LRRC15</i>                                                        | Leucine-rich repeat-containing protein 15         | Facilitates collagen binding activity, fibronectin binding activity and laminin binding activity                                                                                      | -3.88 | 0.0461  |
| <i>TDRD12</i>                                                        | Putative ATP-dependent RNA helicase TDRD12        | Predicted to enable ATP binding activity; RNA helicase activity; and nucleic acid binding activity. Involved in gamete generation, gene silencing by RNA, and piRNA metabolic process | -3.14 | 0.0978  |
| <b>90µg vs 10µg for placentas from pregnancies with girls (n=38)</b> |                                                   |                                                                                                                                                                                       |       |         |
| <i>DDR1</i>                                                          | Epithelial discoidin domain-containing receptor 1 | Receptor tyrosine kinase involved in the regulation of cell growth, differentiation, and metabolism                                                                                   | 1.90  | 0.0915  |

\* Information subtracted from <https://www.genecards.org/>

\*\* DEAD box proteins are proteins characterized by the conserved motif Asp-Glu-Ala-Asp (DEAD)

NACHT: nucleotide-binding and oligomerization domain

LRR: Leucine-rich repeats

PYD: pyrin effector domain
